# Supplementary material for: On the trapping of SOx on CaO–Al2O3-based novel high capacity sorbents
Source: Royal Society of Chemistry journal article supplement (doi:10.1039/b515678e), 2006-01-01
Supplement: b515678e.pdf [file b515678e.pdf]

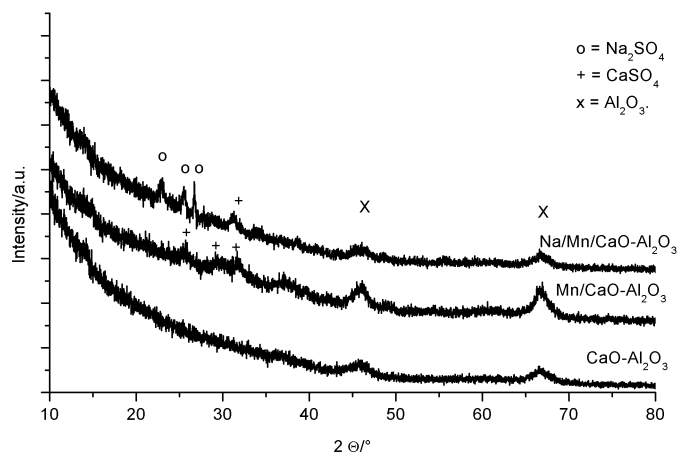

Fig. S1 XRD patterns for samples treated with H<sub>2</sub>O.

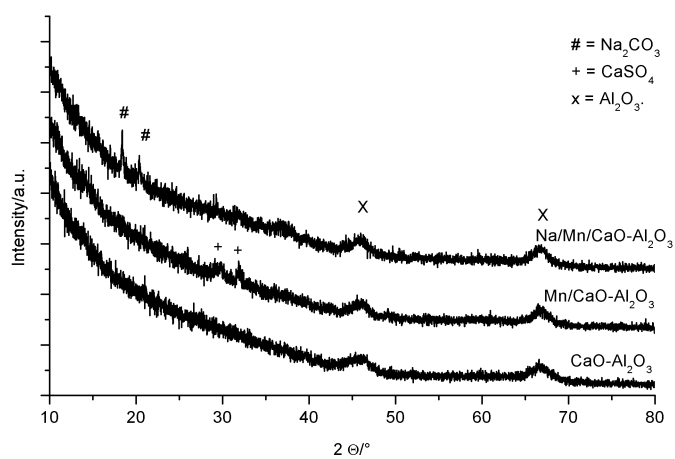

Fig. S2 XRD patterns for samples not treated with H<sub>2</sub>O
